# Supplementary material for: The inflammasome pathway is activated by dengue virus non-structural protein 1 and is protective during dengue virus infection
Source: PubMed Central journal article supplement (PMC11075848; doi:10.1371/journal.ppat.1012167), 2024-04-25
Supplement: ppat.1012167.s002.pdf [file ppat.1012167.s002.pdf]

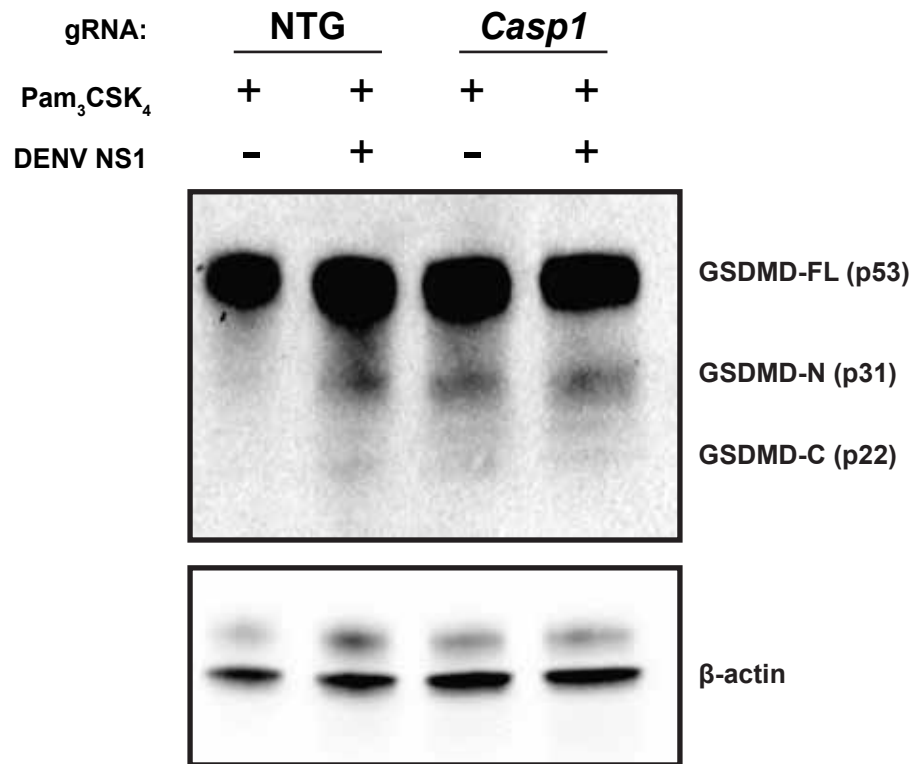

Supplemental Figure 2
